# Supplementary material
Source: PubMed Central journal article supplement (PMC4523496)
Supplement: NIHMS642463-supplement-1.pdf [file NIHMS642463-supplement-1.pdf]

**Supplementary Table 1. NovaScreen assay.** (+)-Naloxone (0.1 uM and 10 uM) has no reliable activity at a broad range of neuronal targets, including neurotransmitters, steroids, ion channels, second messengers, growth factors, hormones, peptides, and enzymes. Values are expressed at the percent inhibition of specific binding; % control values below 50% are considered inactive by the contract laboratory (Caliper Life Sciences).

| % Inhibition at:                                 | (-)- Naloxone        |                      | (+) - Naloxone       |                      |
|--------------------------------------------------|----------------------|----------------------|----------------------|----------------------|
|                                                  | 1×10 <sup>-7</sup> M | 1×10 <sup>-5</sup> M | 1×10 <sup>-7</sup> M | 1×10 <sup>-5</sup> M |
| <b>Neurotransmitter Related</b>                  |                      |                      |                      |                      |
| Adenosine, Non-selective                         | -4.6%                | -7.5%                | 4.2%                 | -0.8%                |
| Adrenergic, Alpha 1, Non-selective               | 3.7%                 | 9.8%                 | 0.6%                 | 2.6%                 |
| Adrenergic, Alpha 2, Non-selective               | 0.4%                 | 5.6%                 | -6.8%                | 0.9%                 |
| Adrenergic, Beta1                                | 7.4%                 | 22.1%                | 7.6%                 | 17.6%                |
| Cannabinoid, CB1                                 | 2.2%                 | 7.0%                 | 3.5%                 | 15.0%                |
| Cannabinoid, CB2                                 | 12.3%                | 18.7%                | 9.2%                 | 13.1%                |
| Dopamine, D4.2                                   | 25.2%                | 28.3%                | 10.6%                | -11.1%               |
| GABA A, Agonist Site                             | 0.8%                 | -0.6%                | 1.6%                 | 2.2%                 |
| GABA A, BDZ, alpha 1 site                        | 0.04%                | 11.4%                | 1.6%                 | 0.7%                 |
| GABA-B                                           | 8.3%                 | -2.3%                | 15.4%                | 14.3%                |
| Glutamate, AMPA Site (Ionotropic)                | -0.3%                | -1.0%                | -0.4%                | 2.6%                 |
| Glutamate, Kainate Site (Ionotropic)             | 4.9%                 | -0.9%                | -0.4%                | 2.4%                 |
| Glutamate, NMDA Agonist Site (Ionotropic)        | -2.5%                | 4.2%                 | 9.7%                 | 8.4%                 |
| Glutamate, NMDA, Phencyclidine Site (Ionotropic) | 8.5%                 | 4.6%                 | 4.1%                 | 2.5%                 |
| Glutamate, mGluR1 (Metabotropic)                 | -4.0%                | 5.9%                 | -0.3%                | 0.8%                 |

| % Inhibition at:                                                  | <b>(-)- Naloxone</b> |                      | <b>(+)- Naloxone</b> |                      |
|-------------------------------------------------------------------|----------------------|----------------------|----------------------|----------------------|
|                                                                   | 1×10 <sup>-7</sup> M | 1×10 <sup>-5</sup> M | 1×10 <sup>-7</sup> M | 1×10 <sup>-5</sup> M |
| <b>Neurotransmitter Related</b>                                   |                      |                      |                      |                      |
| Glutamate,<br>mGluR5<br>(Metabotropic)                            | -12.2%               | -2.0%                | 4.7%                 | 5.1%                 |
| Glutamate, NMDA,<br>Glycine (Stry-<br>insens Site)<br>Ionotropic) | -8.2%                | -11.8%               | 5.7%                 | 5.7%                 |
| Glycine,<br>Strychnine-<br>sensitive                              | 9.0%                 | 6.5%                 | 25.1%                | 40.7%                |
| Histamine, H1                                                     | 2.7%                 | 5.0%                 | 5.8%                 | 5.7%                 |
| Histamine, H2                                                     | 10.8%                | 19.6%                | -12.1%               | 9.7%                 |
| Histamine, H3                                                     | -3.2%                | 15.9%                | -13.0%               | 10.9%                |
| Muscarinic, M1 (                                                  | -5.5%                | 1.6%                 | -4.1%                | 8.3%                 |
| Muscarinic, M2 (                                                  | -0.3%                | 17.4%                | 6.4%                 | 3.9%                 |
| Muscarinic, Non-<br>selective, Central                            | 0.8%                 | 3.7%                 | 1.1%                 | 4.2%                 |
| Muscarinic, Non-<br>selective,<br>Peripheral                      | 9.8%                 | -2.6%                | -9.2%                | 9.9%                 |
| Nicotinic, Muscle<br>(α-BnTx sensitive)                           | 2.5%                 | 10.7%                | -6.8%                | -5.6%                |
| Nicotinic, Neuronal<br>[α-BnTx<br>insensitive]                    | -0.5%                | 9.7%                 | -14.0%               | -3.0%                |
| <b>Opioid, Kappa 1</b>                                            | 93.9%                | 97.4%                | 6.1%                 | 26.3%                |
| <b>Opioid, Mu (h)</b>                                             | 94.9%                | 100.0%               | 13.7%                | 13.0%                |

| % Inhibition at:                                        | <b>(-)- Naloxone</b> |                      | <b>(+)- Naloxone</b> |                      |
|---------------------------------------------------------|----------------------|----------------------|----------------------|----------------------|
|                                                         | $1 \times 10^{-7}$ M | $1 \times 10^{-5}$ M | $1 \times 10^{-7}$ M | $1 \times 10^{-5}$ M |
| <b>Steroids</b>                                         |                      |                      |                      |                      |
| Estrogen                                                | 11.5%                | 1.6%                 | -9.6%                | -2.0%                |
| Glucocorticoid                                          | -1.0%                | 20.0%                | -3.1%                | 0.8%                 |
| Testosterone<br>(cytosolic)                             | -1.8%                | -12.0%               | 12.7%                | 7.7%                 |
| <b>Ion Channels</b>                                     |                      |                      |                      |                      |
| Calcium Channel,<br>Type L<br>(Benzothiazepine<br>Site) | 10.3%                | 13.6%                | 17.0%                | 19.8%                |
| Calcium Channel,<br>Type L<br>(Dihydropyridine<br>Site) | 13.6%                | 9.1%                 | -5.8%                | 14.4%                |
| Calcium Channel,<br>Type N                              | -4.4%                | -2.0%                | -2.9%                | 3.0%                 |
| Potassium<br>Channel, ATP-<br>Sensitive                 | 10.3%                | 13.6%                | 17.0%                | 19.8%                |
| Potassium<br>Channel, Ca <sup>2+</sup><br>Act., VI      | 13.6%                | 9.1%                 | -5.8%                | 14.4%                |
| Sodium, Site 2                                          | -4.4%                | -2.0%                | -2.9%                | 3.0%                 |
| <b>Second Messengers</b>                                |                      |                      |                      |                      |
| Nitric Oxide, NOS<br>(Neuronal-Binding)                 | 9.9%                 | 11.2%                | -0.8%                | -0.9%                |
| <b>Prostaglandins</b>                                   |                      |                      |                      |                      |
| Leukotriene, LTB <sub>4</sub><br>(BLT)                  | -8.8%                | 1.6%                 | -1.7%                | 1.9%                 |
| Leukotriene, LTD <sub>4</sub><br>(CysLT1)               | -17.0%               | -13.1%               | -3.9%                | -11.4%               |
| Thromboxane A <sub>2</sub>                              | 8.5%                 | 1.4%                 | -5.3%                | 1.9%                 |

| % Inhibition at:                              | (-)- Naloxone        |                      | (+) - Naloxone       |                      |
|-----------------------------------------------|----------------------|----------------------|----------------------|----------------------|
|                                               | 1×10 <sup>-7</sup> M | 1×10 <sup>-5</sup> M | 1×10 <sup>-7</sup> M | 1×10 <sup>-5</sup> M |
| <b>Growth Factors/Hormones</b>                |                      |                      |                      |                      |
| Corticotropin Releasing Factor, Non-selective | -5.4%                | -3.6%                | 3.1%                 | 1.6%                 |
| Oxytocin                                      | 6.6%                 | 1.9%                 | -3.9%                | 4.5%                 |
| Platelet Activating Factor, PAF               | -19.5%               | -7.3%                | 11.4%                | 4.2%                 |
| Thyrotropin Releasing Hormone, TRH            | 12.2%                | -0.5%                | -3.4%                | 6.4%                 |
| <b>Brain/Gut Peptides</b>                     |                      |                      |                      |                      |
| Angiotensin II, AT1 (h)                       | -1.2%                | -1.6%                | 5.9%                 | -6.1%                |
| Angiotensin II, AT2                           | 7.3%                 | 3.4%                 | 0.9%                 | 10.6%                |
| Bradykinin, BK2                               | -4.8%                | -9.0%                | -3.9%                | -9.4%                |
| Cholecystokinin, CCK1 (CCKA)                  | -4.5%                | 3.0%                 | -13.3%               | -8.1%                |
| Cholecystokinin, CCK2 (CCKB)                  | 0.9%                 | 3.0%                 | 5.0%                 | 6.4%                 |
| Endothelin, ET-A (h)                          | -12.8%               | 4.9%                 | 0.0%                 | -0.3%                |
| Endothelin, ET-B (h)                          | 1.0%                 | -2.7%                | -12.0%               | -2.9%                |
| Galanin, Non-Selective                        | -3.0%                | -16.9%               | -6.8%                | -14.1%               |
| Neurokinin, NK1                               | 0.0%                 | -0.6%                | -1.4%                | -1.4%                |
| Neurokinin, NK2 (NKA) (h)                     | -9.9%                | 8.5%                 | -3.4%                | -10.5%               |
| Neurokinin, NK3 (NKB)                         | 6.9%                 | 9.7%                 | 16.3%                | 16.4%                |
| <b>Vasoactive</b>                             |                      |                      |                      |                      |
| Intestinal Peptide, Non-selective             | 13.2%                | 14.7%                | 0.6%                 | 2.2%                 |
| Vasopressin 1                                 | 7.1%                 | 7.9%                 | -2.2%                | -11.9%               |

| % Inhibition at:                | <b>(-)- Naloxone</b> |                      | <b>(+)- Naloxone</b> |                      |
|---------------------------------|----------------------|----------------------|----------------------|----------------------|
|                                 | $1 \times 10^{-7}$ M | $1 \times 10^{-5}$ M | $1 \times 10^{-7}$ M | $1 \times 10^{-5}$ M |
| <b>Enzymes</b>                  |                      |                      |                      |                      |
| Decarboxylase,<br>Glutamic Acid | 1.5%                 | -6.0%                | 1.0%                 | 3.6%                 |
| Esterase,<br>Acetylcholine (h)  | 3.8%                 | 4.8%                 | 4.5%                 | 2.4%                 |
| Oxidase, MAO-<br>A, Peripheral  | 4.7%                 | 7.2%                 | 1.2%                 | 6.4%                 |
| Oxidase, MAO-<br>B, Peripheral  | 0.0%                 | 9.0%                 | -4.2%                | -1.6%                |
| Transferase,<br>Choline Acetyl  | 6.8%                 | 26.8%                | 1.1%                 | 4.0%                 |

**Supplementary Table 2. Dopamine transporter and sigma1 receptor assays support that (+)-naloxone does not reliably bind to those sites.** Both (+)- and (-)-naloxone failed to displace [<sup>3</sup>H]WIN 35,428 and [<sup>3</sup>H](+)-pentazocine from the dopamine transporter in rat striatum and sigma receptors from guinea pig brain, respectively. Historical values for cocaine and haloperidol are also provided for DAT and sigma receptor binding as positive controls. As indicated by the table values, (+)-naloxone failed to reliably binding at any of these sites. \*Historical values from previously conducted studies in this laboratory using identical conditions. ^Values from previously conducted studies in this laboratory using identical conditions (Garces-Ramirez, et al., 2011)

| <b>Compound</b> | <b>DAT<br/>Ki Value (nM)</b>  | <b>Sigma<sub>1</sub> Receptor<br/>Ki Value (nM)</b> | <b>Sigma<sub>2</sub> Receptor<br/>Ki Value (nM)</b> |
|-----------------|-------------------------------|-----------------------------------------------------|-----------------------------------------------------|
| (+)-Naloxone    | >10,000                       | >10,000                                             | >10,000                                             |
| (-)-Naloxone    | >10,000                       | >10,000                                             | >10,000                                             |
| Cocaine         | 76.6 (72.6-80.5) <sup>^</sup> | 5,190 (3,800-7060)                                  | 19,300 (16,000-23,300)                              |
| Haloperidol     | NT                            | 2.91 (2.69-3.14) <sup>*</sup>                       | 19.6 (15.6-24.6) <sup>*</sup>                       |

**Supplementary Table 3. Biogenic amine transporter assays support that (+)-naloxone does not reliably affect their binding or function.** (+)-Naloxone and cocaine (positive control) were tested (2-3 tests/dose) by a contract research laboratory (Research Service, R&D22, Dept. of Veterans Affairs Medical Center, Portland, OR) for their effects on radioligand ( $[^{125}\text{I}]\text{RTI-55}$ ) binding to, and transporter specific neurotransmitter uptake by, human dopamine (hDAT), serotonin (hSERT), and norepinephrine (hNET) transporters stably over-expressed in human embryonic kidney (HEK) cells. The  $K_i$  value for  $[^{125}\text{I}]\text{RTI-55}$  displacement and, when significant displacement was found, the Hill coefficient were calculated. When  $[^{125}\text{I}]\text{RTI-55}$  displacement was measurable (i.e.,  $<10\ \mu\text{M}$ ), the  $\text{IC}_{50}$  for radiolabeled neurotransmitter uptake was also calculated. As indicated by the table values, (+)-naloxone failed to reliably affect the binding or function of any of the biogenic amine transporters.

|                                                             |                    |                 |
|-------------------------------------------------------------|--------------------|-----------------|
| <b>HEK-hDAT cells</b>                                       | <b>33,113</b>      | <b>Cocaine</b>  |
| $[^{125}\text{I}]\text{RTI-55}$ Binding $K_i$ (nM)          | $>10\ \mu\text{M}$ | $411 \pm 61$    |
| Hill coefficient                                            |                    | $-1.2 \pm 0.1$  |
| $[^3\text{H}]\text{Dopamine}$ Uptake $\text{IC}_{50}$ (nM)  |                    |                 |
| <b>HEK-hSERT cells</b>                                      | <b>33,113</b>      | <b>Cocaine</b>  |
| $[^{125}\text{I}]\text{RTI-55}$ Binding $K_i$ (nM)          | $>8,300$           | $385 \pm 66$    |
| Hill coefficient                                            |                    | $-1.12 \pm 0.1$ |
| $[^3\text{H}]\text{Serotonin}$ Uptake $\text{IC}_{50}$ (nM) | $>10\ \mu\text{M}$ | $319 \pm 36$    |
| <b>HEK-hNET cells</b>                                       | <b>33,113</b>      | <b>Cocaine</b>  |
| $[^{125}\text{I}]\text{RTI-55}$ Binding $K_i$ (nM)          | $>7,100$           | $632 \pm 51$    |
| Hill coefficient                                            |                    | $-1.0 \pm 0.1$  |
| $[^3\text{H}]\text{NE}$ Uptake $\text{IC}_{50}$ (nM)        | $>10\ \mu\text{M}$ | $445 \pm 43$    |
